# Supplementary material for: Cyclin D1 overexpression induces global transcriptional downregulation in lymphoid neoplasms
Source: JCI journal article supplement (doi:10.1172/jci96520), 2018-07-10

## SUPPLEMENTARY DATA:

### **Cyclin D1 overexpression induces global transcriptional downregulation in lymphoid neoplasms**

Robert Albero<sup>1,7</sup>, Anna Enjuanes<sup>2,3,7</sup>, Santiago Demajo<sup>1</sup>, Giancarlo Castellano<sup>4</sup>, Magda Pinyol<sup>2,3</sup>, Noelia García<sup>1</sup>, Cristina Capdevila<sup>1</sup>, Guillem Clot<sup>1</sup>, Helena Suárez-Cisneros<sup>2</sup>, Mariko Shimada<sup>5,6</sup>, Ken Karube<sup>5,6</sup>, Mónica López-Guerra<sup>1,3,6</sup>, Dolors Colomer<sup>1,3,6</sup>, Sílvia Beà<sup>1,3</sup>, José Ignacio Martín-Subero<sup>1,3</sup>, Elías Campo<sup>1,3,6</sup> and Pedro Jares<sup>1,3,6\*</sup>

<sup>1</sup>*Lymphoid Neoplasm Program, August Pi i Sunyer Biomedical Research Institute (IDIBAPS), Barcelona, Spain.*

<sup>2</sup>*Genomics Unit, August Pi i Sunyer Biomedical Research Institute (IDIBAPS), Barcelona, Spain.*

<sup>3</sup>*Centro de Investigación Biomédica en Red de Cáncer (CIBERONC)*

<sup>4</sup>*Molecular Biology Core, Hospital Clinic of Barcelona, Barcelona, Spain*

<sup>5</sup>*Hematopathology Unit and Cell Biology, Graduate School of Medicine and Faculty of Medicine, University of the Ryukyus, Nishihara, Japan*

<sup>6</sup>*Haematopathology Unit, Department of Anatomic Pathology, Hospital Clinic, University of Barcelona, Barcelona, Spain*

<sup>7</sup>*These authors contributed equally to this work.*

## **SUPPLEMENTARY DATA INDEX:**

### Supplemental Material and Methods

- Cyclin D1 ChIP 2 (Page 3)
- Pol II ChIP (Page 4)
- RNA Sequencing (Page 5)
- Immunoprecipitation and Western blot (Page 5)

### SUPPLEMENTAL FIGURE LEGENDS

- Supplemental Figure 1. (Page 7)
- Supplemental Figure 2. (Page 7)
- Supplemental Figure 3. (Page 7)
- Supplemental Figure 4. (Page 8)
- Supplemental Figure 5. (Page 8)
- Supplemental Figure 6. (Page 9)
- Supplemental Figure 7. (Page 9)

### SUPPLEMENTAL TABLES

- Supplemental Table 1. Enrichment of cyclin D1 ChIP regions in different genomic features (%) (Page 10)
- Supplemental Table 2. Enrichment of cyclin D1 ChIP regions with tag density higher than the mean in each cell line in different genomic features (%) (Page 10)
- Supplemental Table 3. Annotation clusters with Enrichment Score > 5 in CycD1 bound regions. (Page 11)
- Supplemental Table 4. Primers for cyclin D1 ChIP-seq validation and shSequences (Page 14)
- Supplemental Table 5. Antibodies (Page 15)

## Supplemental Material and Methods

### Cyclin D1 ChIP

Fifty million of exponential-growing cells were crosslinked for 10 minutes in 1% (v/v) formaldehyde at room temperature, neutralized with 125mM of glycine and washed twice with cold PBS. Cells were lysed according to the manufacturer's guidelines and chromatin was fragmented with the Covaris S220 instrument for 20 min (5% duty factor, 135w intensity, 200 cycles per burst) using the truChIP™ HighCell Chromatin Shearing Kit with Non-ionic Shearing Buffer (Covaris). Immunoprecipitation was performed with anti-cyclin D1 antibody or control IgG. Sheared chromatin was clarified by 10 mins of maximum speed centrifugation at 4°C. Sheared DNA was immunoprecipitated overnight at 4°C with 20 µg of anti-cyclin D1 antibody or equivalent amount of control IgG. Antibody complexes were recovered with 80µL of equilibrated Protein G Dynabeads (Thermo Fisher Scientific) through co-incubation for 90 min at 4°C. After intensive washes in low salt buffer (1% Triton X-100, 150nM NaCl, 20mM Tris-HCl pH=8.0, 0.1% SDS, 2mM EDTA), high salt buffer (1% Triton X-100, 500nM NaCl, 20mM Tris-HCl pH=8.0, 0.1% SDS, 2mM EDTA), LiCl buffer (1% Nonidet 40, 0.25M LiCl, 10mM TrisHCl pH=8.0, 1% sodium deoxycholate, 1mM EDTA) and TE (10mM TrisHCl pH=8.0, 1mM EDTA), bound chromatin was eluted in ChIP elution buffer (1% SDS, 0.1M NaHCO<sub>3</sub>). Chromatin was decrosslinked and purified with for 4 hours at 65°C in the presence of NaCl and Proteinase K. Lastly, samples were treated with RNase and Proteinase K before purification. AgencourtAMPure beads (Beckman Coulter) were used to purify DNA according to the manufacturer's guidelines. 1% of sheared DNA was used as input control, for qPCR validation and for analyzing sonication efficiency. Equal volumes of eluted chipped

DNA were amplified using SYBR Green PCR Master Mix (Applied Biosystems) under the manufacturer's guidelines. Specific primers were designed for the peaks obtained in the ChIP-seq analysis (Supplemental Table S3). Primers for negative regions were also designed to test the specificity of the enrichment.

### **Pol II ChIP**

Twenty million of exponential-growing cells were crosslinked for 10 minutes in 1% (v/v) formaldehyde at room temperature, neutralized with 125mM of glycine and washed twice with cold PBS. Cytoplasmic membranes were lysed in Pol II lysis buffer (1%SDS, 10mM EDTA, 50mM Tris-HCl pH=8) with protease inhibitors (Thermo Fisher Scientific) for five minutes incubation on ice and nuclei were pelleted by centrifugation (2000g, 5min, 4°C). Pol II lysis buffer was added to obtain a concentration of 25 million nuclei/mL and sonicated with a Bioruptor (Diagenode) for 18 mins (Cycles: 30''on/30''off, High Power, 4°C ). In order to precipitate the SDS, sonicates were incubated on ice for 30-60 mins. Following 15 mins 4°C centrifugation at maximum speed, the supernatants were diluted with ChIP buffer between 8-10 times. ChIP buffer was added to ensure that all samples had the same final volume. 30µg of total chromatin were immunoprecipitated overnight at 4°C with 20 µg of anti-Pol II antibody or equivalent amount of control IgG. Antibody complexes were recovered after 90 mins of co-incubation with 50µL of equilibrated Protein G Dynabeads (Thermo Fisher Scientific) at 4°C. Beads were washed for five mins at 4°C in low salt buffer (1% Triton X-100, 150nM NaCl, 20mM Tris-HCl pH=8.0, 0.1% SDS, 2mM EDTA), high salt buffer (1% Triton X-100, 500nM NaCl, 20mM Tris-HCl pH=8.0, 0.1% SDS, 2mM EDTA), LiCl buffer (1% Nonidet 40, 0.25M LiCl, 10mM TrisHCl pH=8.0, 1% sodium deoxycholate, 1mM EDTA) and TE (10mM TrisHCl pH=8.0, 1mM EDTA).

Bound chromatin was eluted in ChIP elution buffer (1% SDS, 0.1M NaHCO<sub>3</sub>). Chromatin was decrosslinked for 4 hours at 65°C in the presence of NaCl and Proteinase K. Lastly, samples were treated with RNase A (Sigma Aldrich) and Proteinase K before purification. Samples were purified using the phenol-chloroform method. 1% of sheared DNA was used as input control, for qPCR validation and for analyzing sonication efficiency.

### **RNA Sequencing**

Total RNA was isolated using Trizol (Zymo Research). Preparation of RNA-seq libraries was carried out using the TruSeq RNA Sample Preparation Kit (Illumina) according to the manufacturer's standard protocol. Briefly, mRNA molecules were purified from 800ng of total RNA using poly-T oligo attached magnetic beads. Following purification, mRNA was fragmented using divalent cations at 94°C and copied into first strand cDNA using reverse transcriptase and random primers. Second strand cDNA synthesis was performed using DNA Polymerase I and RNase H. The cDNA fragments were end repaired and a single 'A' base overhang was added before adapter ligation. The products were then purified and amplified by PCR to generate the final cDNA library. The libraries were 75 bp paired-end sequenced at ~ 80 million reads per library with Illumina technology.

### **Immunoprecipitation and Western blot**

Protein extracts preparation and western blot analysis were performed as previously described (Palomero et al, 2014). The primary antibodies and the working dilutions are described in Supplemental Table 5. For endogenous CDK9 and Cyclin D1 immunoprecipitation, approximately 15-20 million exponentially growing cells were

washed in PBS RT (300g, 5 mins) twice. Protein extracts were done in immunoprecipitation buffer (0.5% Nonidet-40, 150mM NaCl, 10mM KCl, 1.5mM MgCL, 10mM Tris-HCl pH=8.0) with protease inhibitors (Thermo Fisher Scientific). Total protein was quantified and 1.5mg of total protein was used per co-immunoprecipitation and incubated overnight at 4°C with gently mixing with 7.5µg of CDK9, cyclin D1 antibody or IgG Mouse control antibody in a final volume of 350µL of Co-IP buffer. Then, for each sample 50µL of protein G-magnetic beads (Invitrogen) were equilibrated by washing twice with co-IP buffer. Beads were finally resuspended in 25µL of co-IP buffer and added to co-IPS. After 90 mins incubation, supernatants were recovered (Unbound fractions) and beads were washed twice for 5 mins with gentle rotating at 4°C with co-IP buffer. To elute, 40µL of Laemmli buffer (x2.5) without DTT were added to beads and heated at 70°C for 10 mins. A second elution was performed with 40µL of sample buffer (x2.5) and 5µL of DTT 1M. Finally, 5µL of DTT 1M were added to first elution and both elutions were boiled as usual for western blotting. Anti-Mouse light chain antibody-HRP conjugate (Millipore) was used to detect primary antibodies. Flag immunoprecipiation of CDK9-Flag complexes was performed using ANTI-FLAG® M2 Affinity Gel ((Sigma-Aldrich) following manufacturer's guidelines.

## SUPPLEMENTAL FIGURE LEGENDS

### Supplemental Figure 1

A) Western blot analysis of cyclin D1 in MCL cell lines.  $\alpha$ -Tubulin was used as loading control. B) Linear correlation between cyclin D1 protein amount and the number of ChIP-seq peaks in MCL cell lines. Cyclin D1 intensity was corrected by  $\alpha$ -Tubulin. Pearson correlation is shown. C) Genome browser views displaying the ChIP-seq tag density of the entire length of four representative cyclin D1 target genes in GRANTA-519 cell line.

### Supplemental Figure 2

A) Profile of cyclin D1 occupancy around the TSS according to gene expression in UPN-1, JeKo-1 and GRANTA-519 cell lines. Genes were divided in ten groups based on their expression levels (from higher to lower expression). The average cyclin D1 ChIP-seq tag density distribution around the TSS ( $\pm$  1kb) is displayed for each group. B) Western blot analysis of cyclin D1 expression in Z-138 MCL cell line (b), JVM13 transduced with empty-vector (JVM13-Ctrl) and JVM13 transduced with constitutive HA tagged Cyclin D1-T286A (JVM13-cD1<sup>T286A</sup>) (a).  $\beta$ -Actin was used as loading control. C) Linear correlation between cyclin D1 protein amount and the number of ChIP-seq peaks in four MCL cell lines and JVM13-cD1<sup>T286A</sup> cells. D-E) Profile of cyclin D1 occupancy around the TSS in JVM13-cD1<sup>T286A</sup> cells. Genes were divided in ten groups regarding gene expression in JVM13-cD1<sup>T286A</sup> cells (D) or JVM13 control cells (E) from higher to lower expression. The average cyclin D1 ChIP-seq tag density distribution around the TSS ( $\pm$  1kb) is displayed for each group.

### Supplemental Figure 3

A) Kernel distribution of normalized cyclin D1 tag density showing a unimodal distribution in MCL cell lines. B) Heatmap showing the cyclin D1 ChIP-seq tag density within gene intervals of Z-138 and MYC ChIP-seq tag density in GM12878. Each row represents an interval of +/- 2kb around the summit part of the peak in Z-138. Regions are sorted by the number of cyclin D1 tags in Z-138. C) Tag density of cyclin D1 peaks in Z-138 with or without MYC co-localization in GM12878 cells. Data is shown as mean  $\pm$  SEM. \*\*\* $P < 2.2 \times 10^{-16}$ , Student's t-test, Holm Bonferroni correction.

### Supplemental Figure 4

A) RNA quantification by pyronin Y staining in JVM13 inducible cell lines. Only cells in G2/M phase were analyzed. Data is shown relative to the Ctrl (mean +/- SEM, n=3). \* $P < 0.05$ , Student's t-test. B) RNA quantification by Nanodrop corresponding to total RNA extracted from one million cells in JVM2 inducible cell lines. Results are shown relative to the Ctrl (mean +/- SEM, n=9). C) RNA quantification by pyronin Y staining in JVM2 inducible cell lines. Only cells in G1 phase were analyzed. Pyronin Y mean signal is shown relative to the Ctrl (mean +/- SEM, n=3). \* $P < 0.05$ , Student's t-test. D) RNA quantification by pyronin Y staining in cyclin D1-depleted GRANTA-519 cells. Only cells in G2/M phase were analyzed. Data is shown relative to the Ctrl (mean +/- SEM, n=4). \*\*\* $P < 0.001$ , Student's t-test. Holm Bonferroni correction for multiple comparisons was applied to panels A-D. E) Western blot showing cyclin D1 expression in different MCL cell lines and cyclin D1 overexpressing cell models. Endogenous cyclin D1 (b) or overexpressed-tagged cyclin D1 (a) are shown.  $\alpha$ -Tubulin was used as loading control. F) Western blot showing cyclin D1 in different multiple myeloma cell lines.  $\alpha$ -Tubulin was used as loading control. G) Correlation between cyclin D1 protein



levels measured by western-blot and the total RNA content per cell quantified by pyronin staining in primary MCL cases. Pyronin signals represented are the mean of two technical replicates of G1 cell fraction. Cyclin D1 intensity was corrected by  $\beta$ -Actin.

### **Supplemental Figure 5**

Representative images of EU staining (red) for the evaluation of nascent RNA synthesis after cyclin D1 induction for 2 days in JVM-13 cells (A) or following cyclin D1 depletion in GRANTA-519 cells (B). DAPI (blue) was used to create the nuclear masks for quantification. Scale bars, 10  $\mu$ m.

### **Supplemental Figure 6**

A) Percentage of TSG and non-TSG genes with cyclin D1 peaks in their promoter regions (-5Kb from TSS) that were found expressed by the Cancer Panel in JVM13-cD1<sup>T286A</sup> (P=0.038,  $\chi^2$  test). B) Percentage of TSG and non-TSG genes with peaks in the four MCL cell lines (P= P<3.3E-9,  $\chi^2$  test). C) Proportion of TSG genes distributed among the four quartiles corresponding to the gene expression levels in primary MCL cases. The group of highly expressed genes shows enrichment in TSGs. Color indicates percentage of TSG in each quartile.

### **Supplemental Figure 7**

A) Pol II occupancy on three representative cyclin D1-bound genes. Pol II (8GW16) profiles are shown in JVM13-Ctrl and JVM13-D1<sup>T286A</sup> inducible cell lines. Cyclin D1 binding pattern in JVM13-D1<sup>T286A</sup> is also represented. B) Correlation between normalized Pol II ChIP-seq tag density at promoters in JVM13-Ctrl and JVM13-

D1<sup>T286A</sup>. Promoters were sorted into 50 equal-size groups based on ChIP-seq tag densities in JVM13-Ctrl. Dashed line marks diagonal. C) Western blot showing total Pol II (Ilo and Ila isoforms), Pol II (8WG16) and cyclin D1 in 14 primary MCL cases. MCL cases with cyclin D1 expression above the mean were considered as high cyclin D1 (red) and samples below the mean as low cyclin D1 (green).  $\beta$ -Actin was used as loading control

### **Supplemental Figure 8**

A) Co-immunoprecipitation experiment in JeKo-1 using antibodies against cyclin D1 and control IgG. Immunoprecipitated proteins were analyzed by western blot analysis by blotting with cyclin D1 and Pol II antibody. Input at 1% was loaded as a control. B) Endogenous CDK9 co-immunoprecipitation experiment in Z-138 and Jeko-1 (C) using antibodies against CDK9 (B) and control IgG. Immunoprecipitated proteins were analyzed by Western blot with cyclin D1 and CDK9 antibodies. Input at 1% was loaded as a control.

## SUPPLEMENTAL TABLES

**Supplemental Table 1. Enrichment of cyclin D1 ChIP regions in different genomic features (%)**

| Genomic feature   | GRANTA-519 | Jeko-1 | UPN-1 | Z-138 | Genomicbackground |
|-------------------|------------|--------|-------|-------|-------------------|
| <b>Promoter</b>   | 26.0       | 26.7   | 24.8  | 18.9  | 3.5               |
| <b>Exon</b>       | 4.0        | 5.2    | 3.5   | 3.5   | 1.9               |
| <b>Intron</b>     | 23.9       | 24.0   | 26.2  | 28.6  | 42.4              |
| <b>Intergenic</b> | 46.1       | 44.1   | 45.5  | 49.0  | 52.2              |

**Supplemental Table 2. Enrichment of cyclin D1 ChIP regions with tag density higher than the mean in each cell line in different genomic features (%)**

| Genomic feature   | GRANTA-519 | Jeko-1 | UPN-1 | Z-138 | Genomicbackground |
|-------------------|------------|--------|-------|-------|-------------------|
| <b>Promoter</b>   | 56         | 56     | 49    | 42    | 3.5               |
| <b>Exon</b>       | 5          | 6      | 5     | 5     | 1.9               |
| <b>Intron</b>     | 12         | 12     | 15    | 19    | 42.4              |
| <b>Intergenic</b> | 27         | 26     | 31    | 34    | 52.2              |

**Supplemental Table 3. Annotation clusters with Enrichment Score>5 in CycD1-bound regions.**

| Annotation_Cluster1 Enrichment Score: 11.575770882907724 |                                     |          |            |
|----------------------------------------------------------|-------------------------------------|----------|------------|
| Category                                                 | Term                                | FDR      | EASE score |
| GOTERM_BP_FAT                                            | GO:0006412~translation              | 6.11E-13 | 3.04E-16   |
| KEGG_PATHWAY                                             | hsa03010:Ribosome                   | 3.21E-08 | 2.60E-11   |
| GOTERM_BP_FAT                                            | GO:0006414~translational elongation | 4.35E-06 | 2.36E-09   |

  

| Annotation Cluster2 Enrichment Score: 11.362884382236716 |                                          |          |            |
|----------------------------------------------------------|------------------------------------------|----------|------------|
| Category                                                 | Term                                     | FDR      | EASE score |
| GOTERM_BP_FAT                                            | GO:0007049~cell cycle                    | 2.65E-12 | 1.49E-15   |
| GOTERM_BP_FAT                                            | GO:0000278~mitotic cell cycle            | 4.68E-11 | 2.54E-14   |
| GOTERM_BP_FAT                                            | GO:0022402~cell cycle process            | 9.85E-11 | 5.35E-14   |
| GOTERM_BP_FAT                                            | GO:0022403~cell cycle phase              | 7.09E-10 | 3.85E-13   |
| GOTERM_BP_FAT                                            | GO:0000087~M phase of mitotic cell cycle | 2.40E-08 | 1.30E-11   |
| GOTERM_BP_FAT                                            | GO:0051301~cell division                 | 2.08E-07 | 1.12E-10   |
| GOTERM_BP_FAT                                            | GO:0007067~mitosis                       | 2.80E-07 | 1.52E-10   |
| GOTERM_BP_FAT                                            | GO:0000280~nuclear division              | 2.80E-07 | 1.52E-10   |
| GOTERM_BP_FAT                                            | GO:0000279~M phase                       | 5.17E-07 | 2.80E-10   |
| GOTERM_BP_FAT                                            | GO:0048285~organelle fission             | 5.76E-07 | 3.10E-10   |

  

| Annotation Cluster3 Enrichment Score: 8.546639796201333 |                                                                                                 |            |            |
|---------------------------------------------------------|-------------------------------------------------------------------------------------------------|------------|------------|
| Category                                                | Term                                                                                            | FDR        | EASE score |
| GOTERM_BP_FAT                                           | GO:0006396~RNA processing                                                                       | 4.11E-13   | 2.68E-16   |
| GOTERM_BP_FAT                                           | GO:0016071~mRNA metabolic process                                                               | 5.33E-07   | 2.89E-10   |
| GOTERM_BP_FAT                                           | GO:0008380~RNA splicing                                                                         | 5.64E-07   | 3.06E-10   |
| GOTERM_BP_FAT                                           | GO:0006397~mRNA processing                                                                      | 2.86E-05   | 1.55E-08   |
| GOTERM_BP_FAT                                           | GO:0000398~nuclear mRNA splicing, via spliceosome                                               | 2.71E-04   | 1.47E-07   |
| GOTERM_BP_FAT                                           | GO:0000377~RNA splicing, via transesterification reactions with bulged adenosine as nucleophile | 2.71E-04   | 1.47E-07   |
| GOTERM_BP_FAT                                           | GO:0000375~RNA splicing, via transesterification reactions                                      | 2.71E-04   | 1.47E-07   |
| KEGG_PATHWAY                                            | hsa03040:Spliceosome                                                                            | 0.00439914 | 3.56E-06   |

  

| Annotation Cluster4 Enrichment Score: 8.190837507398893 |                                            |          |            |
|---------------------------------------------------------|--------------------------------------------|----------|------------|
| Category                                                | Term                                       | FDR      | EASE score |
| GOTERM_BP_FAT                                           | GO:0006259~DNA metabolic process           | 8.06E-07 | 4.37E-10   |
| GOTERM_BP_FAT                                           | GO:0006974~response to DNA damage stimulus | 4.40E-06 | 2.39E-09   |
| GOTERM_BP_FAT                                           | GO:0006281~DNA repair                      | 2.22E-05 | 1.20E-08   |
| GOTERM_BP_FAT                                           | GO:0033554~cellular response to stress     | 2.52E-04 | 1.36E-07   |

  

| Annotation Cluster5 Enrichment Score: 7.557183124723839 |                                                 |          |            |
|---------------------------------------------------------|-------------------------------------------------|----------|------------|
| Category                                                | Term                                            | FDR      | EASE score |
| GOTERM_BP_FAT                                           | GO:0022613~ribonucleoprotein complex biogenesis | 9.06E-10 | 2.50E-13   |
| GOTERM_BP_FAT                                           | GO:0042254~ribosome biogenesis                  | 2.10E-06 | 1.14E-09   |
| GOTERM_BP_FAT                                           | GO:0034470~ncRNA processing                     | 1.28E-04 | 6.93E-08   |

|               |                                    |            |          |
|---------------|------------------------------------|------------|----------|
| GOTERM_BP_FAT | GO:0034660~ncRNA metabolic process | 2.35E-04   | 1.27E-07 |
| GOTERM_BP_FAT | GO:0006364~rRNA processing         | 0.01140151 | 6.19E-06 |
| GOTERM_BP_FAT | GO:0016072~rRNA metabolic process  | 0.02713958 | 1.47E-05 |

**Annotation Cluster6 Enrichment Score: 6.433945684537975**

| Category      | Term                                                                  | FDR        | EASE score |
|---------------|-----------------------------------------------------------------------|------------|------------|
| GOTERM_BP_FAT | GO:0044265~cellular macromolecule catabolic process                   | 6.96E-06   | 3.78E-09   |
| GOTERM_BP_FAT | GO:0043632~modification-dependent macromolecule catabolic process     | 8.36E-05   | 4.54E-08   |
| GOTERM_BP_FAT | GO:0019941~modification-dependent protein catabolic process           | 8.36E-05   | 4.54E-08   |
| GOTERM_BP_FAT | GO:0006511~ubiquitin-dependent protein catabolic process              | 1.03E-04   | 5.61E-08   |
| GOTERM_BP_FAT | GO:0009057~macromolecule catabolic process                            | 1.59E-04   | 8.61E-08   |
| GOTERM_BP_FAT | GO:0051603~proteolysis involved in cellular protein catabolic process | 2.78E-04   | 1.50E-07   |
| GOTERM_BP_FAT | GO:0044257~cellular protein catabolic process                         | 3.65E-04   | 1.98E-07   |
| GOTERM_BP_FAT | GO:0030163~protein catabolic process                                  | 0.00107267 | 5.82E-07   |
| GOTERM_BP_FAT | GO:0006508~proteolysis                                                | 97.8774912 | 1.88E-06   |

**Annotation Cluster7 Enrichment Score: 5.754700439254545**

| Category      | Term                               | FDR        | EASE score |
|---------------|------------------------------------|------------|------------|
| GOTERM_BP_FAT | GO:0051276~chromosome organization | 1.15E-05   | 6.26E-09   |
| GOTERM_BP_FAT | GO:0006325~chromatin organization  | 0.0408486  | 2.21E-05   |
| GOTERM_BP_FAT | GO:0016568~chromatin modification  | 0.07203701 | 3.91E-05   |

**Supplemental Table 4. Primers for cyclin D1 ChIP-seq validation and shSequences**

| <b>Primers</b>      |                 |                         |
|---------------------|-----------------|-------------------------|
| <i>Gene</i>         | <i>Position</i> | <i>Sequence</i>         |
| <i>XPC</i>          | Forward         | TTTAAGGAGGTCGCTCGAAG    |
| <i>XPC</i>          | Reverse         | GGCCATTTTTCCTGAGTCTG    |
| <i>RFC3</i>         | Forward         | TAGCCTTCCGTCCAAAATC     |
| <i>RFC3</i>         | Reverse         | GGCCTACGCTTGAAAATCC     |
| <i>CCNT1</i>        | Forward         | CCGAGTTAACAGCCAATATGC   |
| <i>CCNT1</i>        | Reverse         | GTTCTCGCGGGAAGATACAC    |
| <i>CDC5L</i>        | Forward         | CTTTGGCCAGAGTGGTTTG     |
| <i>CDC5L</i>        | Reverse         | GATATTGGGTGGCTGAAAGG    |
| <i>POLE</i>         | Forward         | CGCTCCTCAGAGACATGGA     |
| <i>POLE</i>         | Reverse         | CAAATTTCTCCCCTGAAGCA    |
| <i>TIPIN</i>        | Forward         | CTCACCTCACGCAGAAAACA    |
| <i>TIPIN</i>        | Reverse         | CCCAGGAGTTCCCGAGTATC    |
| <i>MRE11A</i>       | Forward         | GCAGGATCCGTGAAAAGAA     |
| <i>MRE11A</i>       | Reverse         | AGAGCCGAACTGGACTTGAA    |
| <i>RPL4</i>         | Forward         | CCAAACCACTCCTATTCCCT    |
| <i>RPL4</i>         | Reverse         | TAGCCAACCTCGTAATAAGACCA |
| Chr12negativeregion | Forward         | CCATTGTAGGAGCCAAATCC    |
| Chr12negativeregion | Reverse         | ATTGAACACCAGCTCCCAAC    |

  

| <b>sh_Sequences</b> |                  |                                                                |
|---------------------|------------------|----------------------------------------------------------------|
| <i>Identifier</i>   | <i>Reference</i> | <i>Sequence</i>                                                |
| shCycD1 #1          | (TRCN0000295873) | CCGGCCACAGATGTGAAGTTCATTTCTCGAGAAATGA<br>ACTTCACATCTGTGGTTTTTG |
| shCycD1 #2          | (TRCN0000295874) | CCGGACAACCTCCTGTCCTACTACCCTCGAGGGTAGTA<br>GGACAGGAAGTTGTTTTTTG |

**Supplemental Table 5. Antibodies**

| Primary antibodies |                                    |                 |               |      |        |
|--------------------|------------------------------------|-----------------|---------------|------|--------|
| Reference          | Antigen detected                   | Company         | W.B. Dilution | ChIP | Co- IP |
| sc-8396            | Cyclin D1                          | Santa Cruz      | 1:1000        | X    | X      |
| sc-20044           | Cyclin D1                          | Santa Cruz      | 1:1000        |      |        |
| sc-753             | Cyclin D1                          | Santa Cruz      | 1:1000        |      |        |
| 13499              | Phospho-Rpb1<br>CTD (Ser2) (E1Z3G) | Cell signalling | 1:500         |      |        |
| sc-899             | Pol II (N-20)                      | Santa Cruz      | 1:100         |      |        |
| sc-55492           | Pol II (F-12)                      | Santa Cruz      | 1:500         |      |        |
| 920101             | RNA Polymerase<br>II(8WG16)        | Biolegend       | 1:500         | X    |        |
| sc-13130           | CDK9 (C-20)                        | Santa Cruz      | 1:1000        |      | X      |
| CP06-100UG         | Alpha-Tubulin                      | Oncogene        | 1:10000       |      |        |
| A5341-100UL        | Beta-actin                         | Sigma           | 1:5000        |      |        |

| Secondary antibodies |                                         |                 |               |
|----------------------|-----------------------------------------|-----------------|---------------|
| Reference            | Antigen detected                        | Company         | W.B. Dilution |
| P0217                | Anti-rabbit (HRP<br>conjugated)         | DAKO            | 1:3000        |
| P0260                | Anti-mouse (HRP<br>conjugated)          | DAKO            | 1:3000        |
| AP200P               | Anti-Mouse light chain<br>antibody- HRP | Millipore       | 1:1000        |
| 7074                 | Anti-rabbit IgG, HRP-<br>linked         | Cell signalling | 1:1000        |

| ChIP/IP Control antibodies |                  |            |
|----------------------------|------------------|------------|
| Reference                  | Antigen detected | Company    |
| sc-2025                    | Normal mouse IgG | Santa Cruz |

# Supplemental Figure 1.

**A**

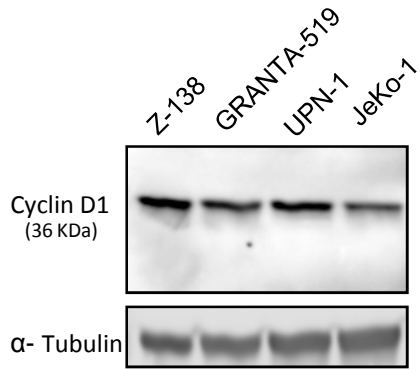

**B**

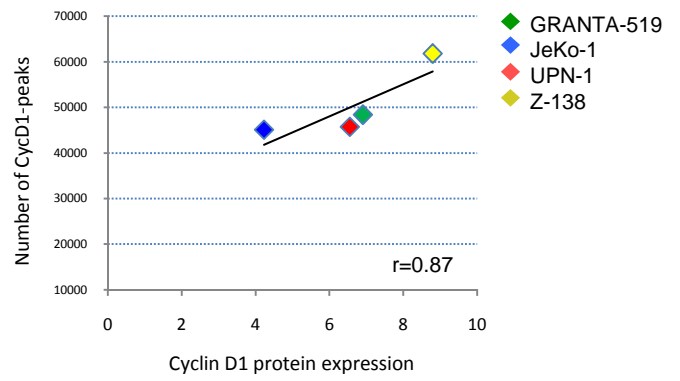

**C**

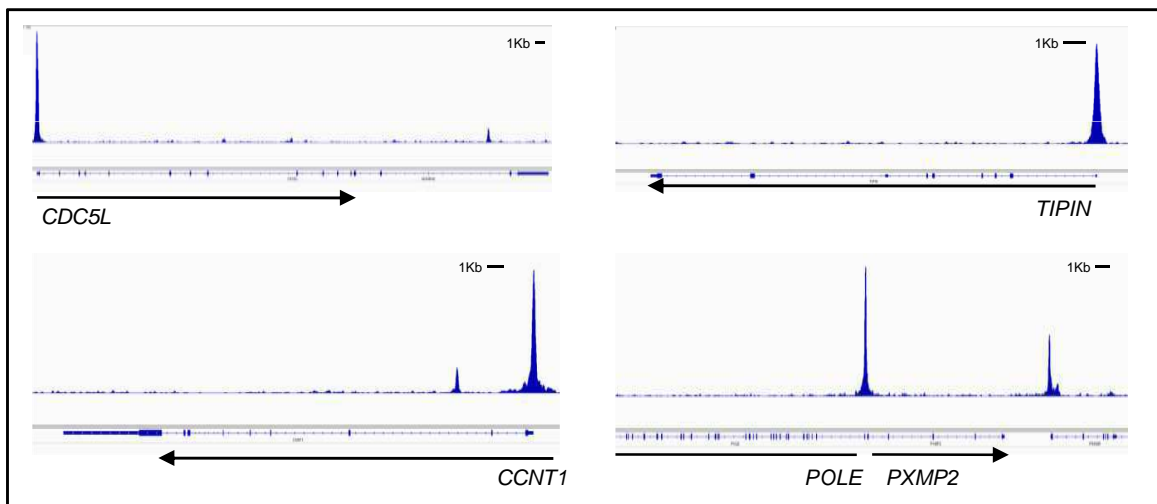



## Supplemental Figure 2.

A

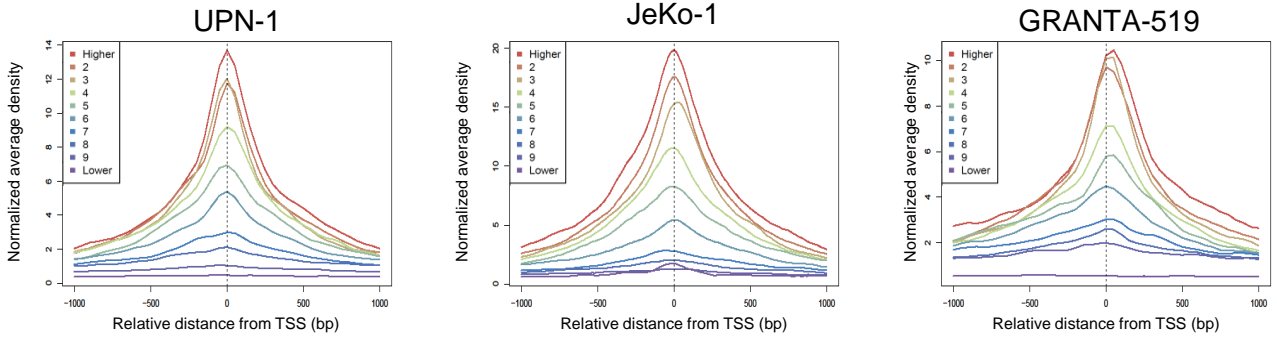

B

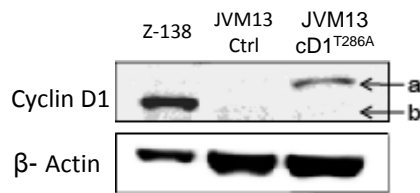

C

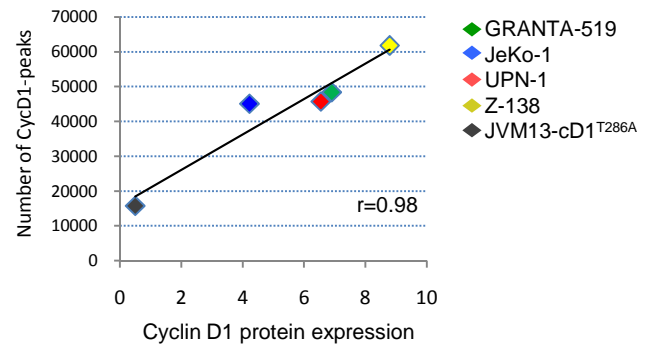

D

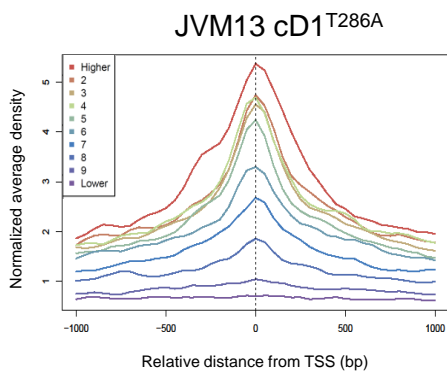

E

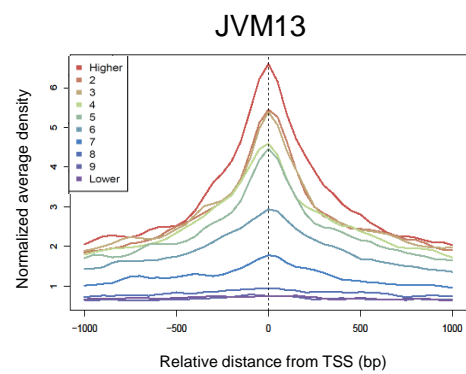

### Supplemental Figure 3.

**A**

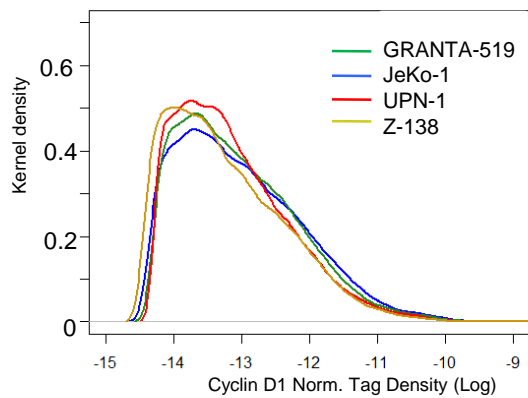

**B**

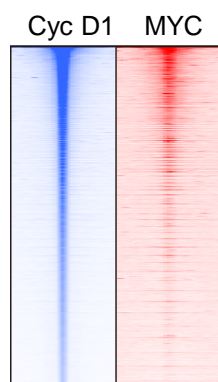

**C**

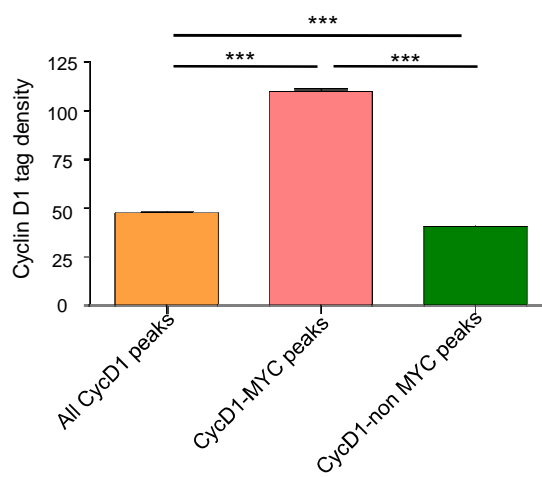

## Supplemental Figure 4.

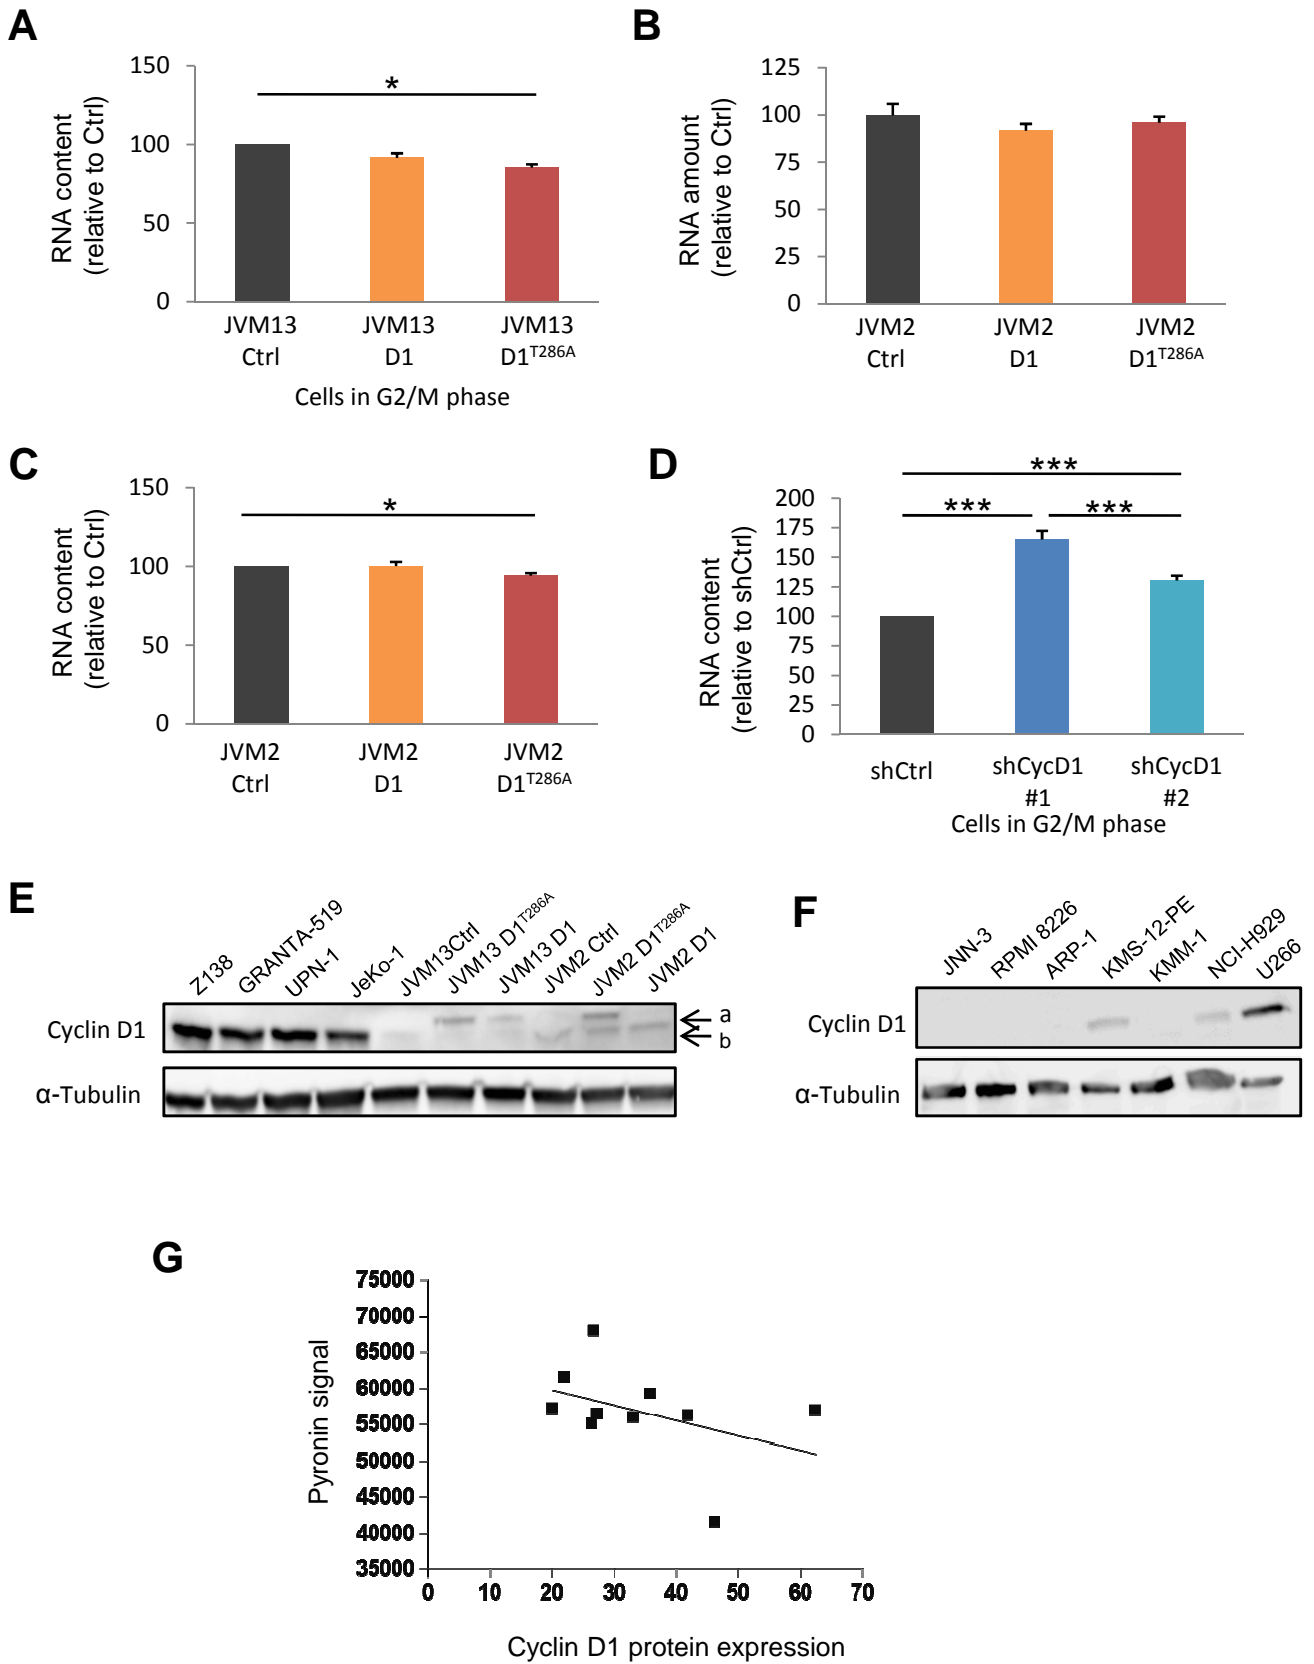

## Supplemental Figure 5.

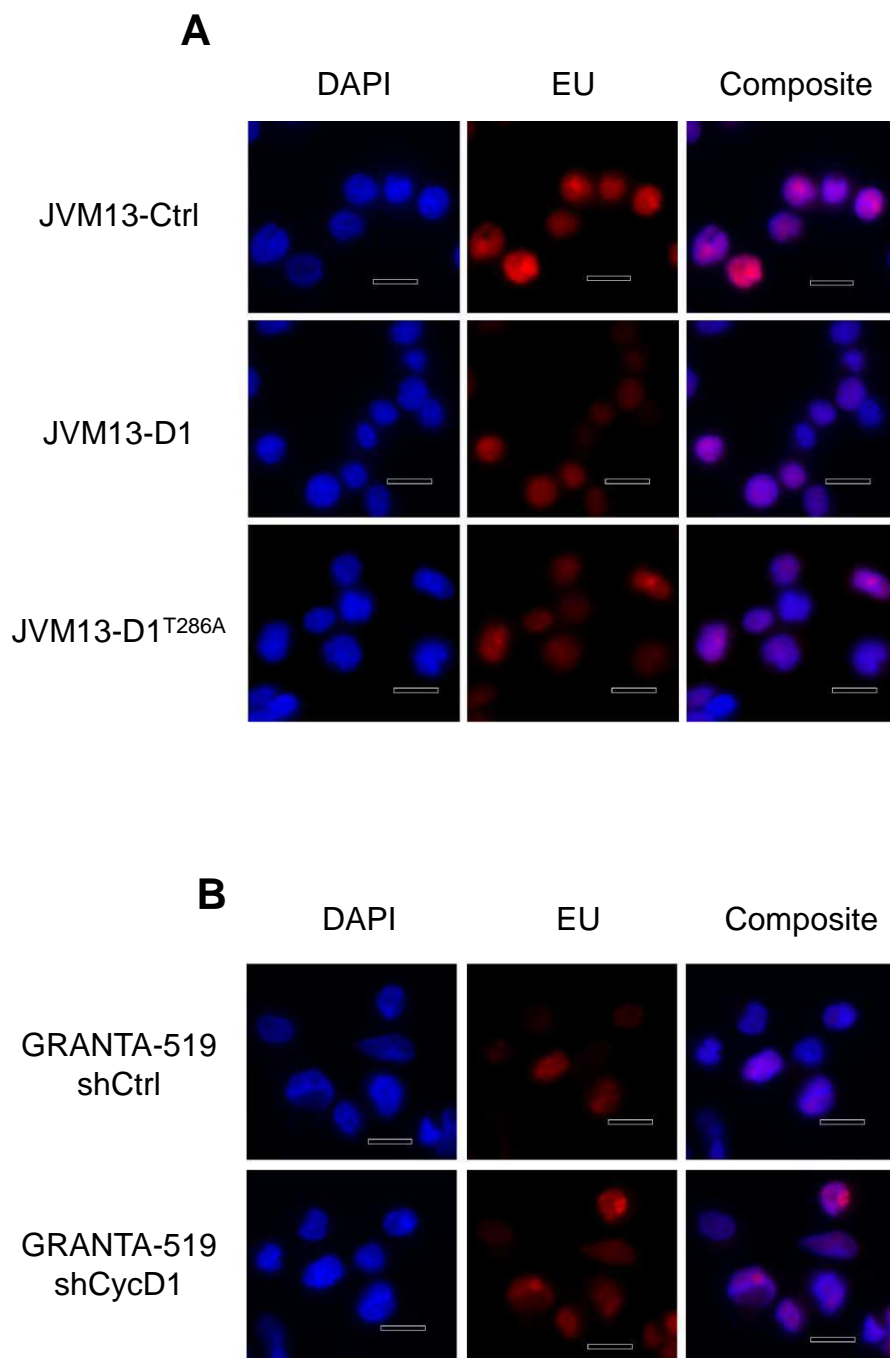

Supplemental Figure 6.

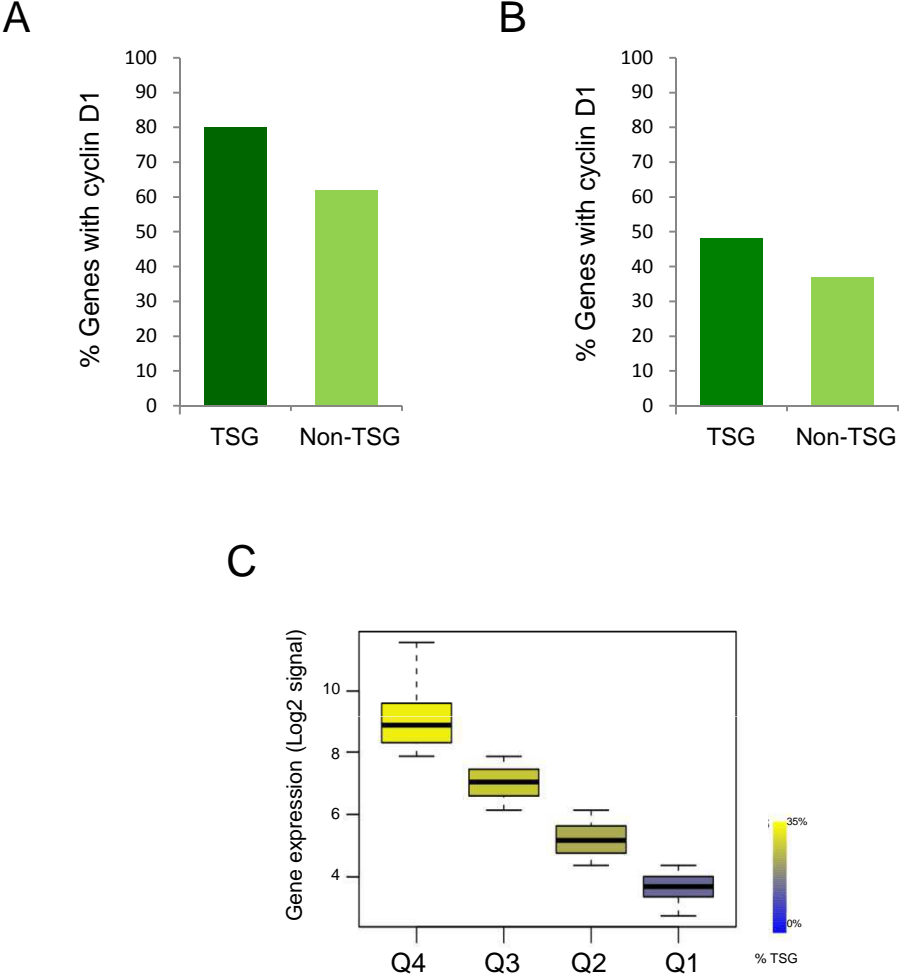

# Supplemental Figure 7.

**A**

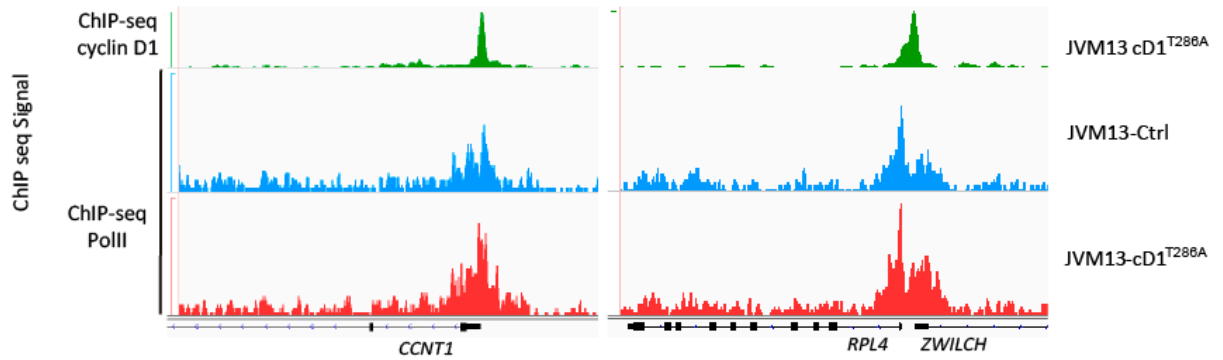

**B**

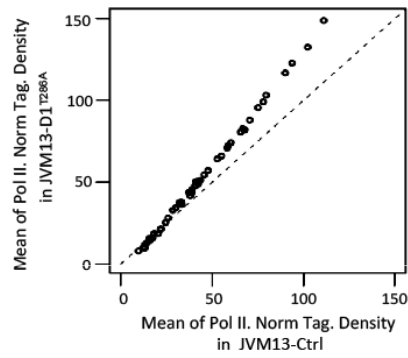

**C**

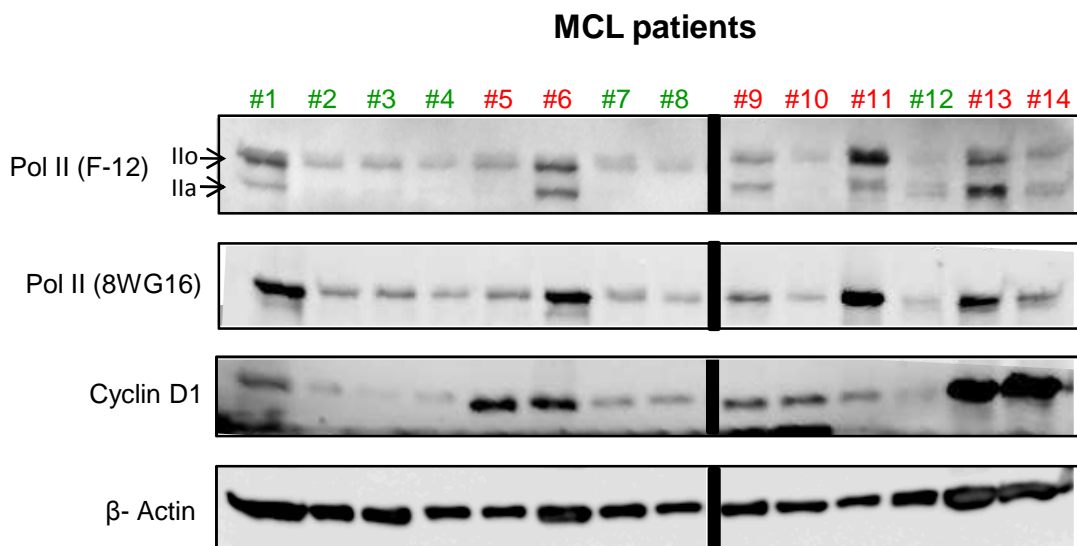

**Supplemental Figure 8.**

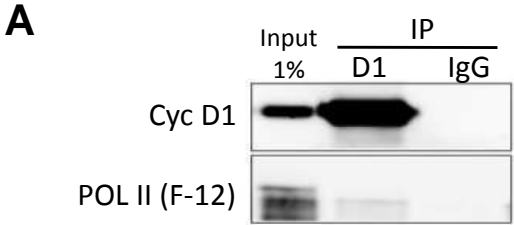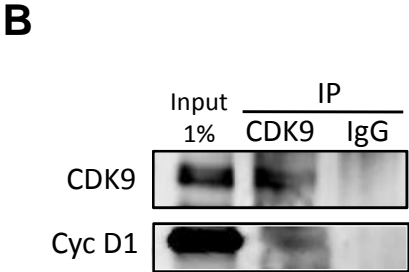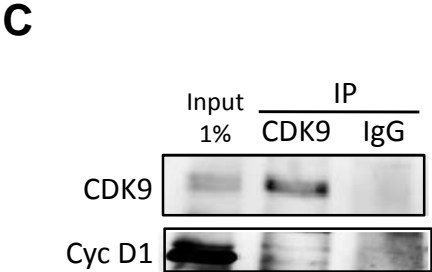

Supplement: sd1 [file 1]
